# Supplementary material for: Comparative oral and intravenous pharmacokinetics of phlorizin in rats having type 2 diabetes and in normal rats based on phase II metabolism
Source: Royal Society of Chemistry journal article supplement (doi:10.1039/c8fo02242a), 2019-01-01
Supplement: c8fo02242a1.pdf [file c8fo02242a1.pdf]

## supplemental information available section

### Supplementary Table

**Supplementary Table 1.** Experimental results of T2D rats model and control group after 8 weeks

|           | Weight(g)    | Water intake(mL/d) | Food intake(g/d) | FBG(mmol/L)  | FINS(mU/L)   | HOMA-IR      |
|-----------|--------------|--------------------|------------------|--------------|--------------|--------------|
| NR(n=6)   | 299.8 ± 10.2 | 22.5 ± 3.1         | 30.3 ± 3.9       | 5.8 ± 0.6    | 12.4 ± 1.8   | 2.9 ± 1.5    |
| T2D(n=24) | 228.8 ± 35.9 | 149.1 ± 6.5**      | 23.6 ± 0.9**     | 23.6 ± 7.6** | 27.2 ± 2.2** | 29.8 ± 5.4** |

NR: normal rats; T2D: type 2 diabetes rats. Normal rats were given ordinary feed, type 2 diabetes rats were given high-calorie diets. Differences were assessed by One-way ANOVA and denoted as follows: \*  $p < 0.05$ , \*\*  $p < 0.01$ .

**Supplementary Table 2.** Intra and inter-day precision and accuracy of PHZ and PHT in rat plasma

| Nominal concentration<br>( $\mu\text{g/mL}$ ) | Intra-day (n = 6)                           |         |        | Inter-day (n = 6)                           |         |        |       |
|-----------------------------------------------|---------------------------------------------|---------|--------|---------------------------------------------|---------|--------|-------|
|                                               | Concentration<br>found ( $\mu\text{g/mL}$ ) | RSD (%) | RE (%) | Concentration<br>found ( $\mu\text{g/mL}$ ) | RSD (%) | RE (%) |       |
| PHZ                                           | 0.40                                        | 0.41    | 10.36  | 0.32                                        | 0.42    | 9.06   | 3.87  |
|                                               | 10                                          | 9.73    | 6.00   | -2.71                                       | 9.70    | 6.59   | -3.09 |
|                                               | 80                                          | 77.80   | 4.08   | -2.75                                       | 78.74   | 4.23   | -1.57 |
| PHT                                           | 0.128                                       | 0.15    | 1.87   | 17.19                                       | 0.15    | 1.31   | 17.28 |
|                                               | 16                                          | 15.66   | 5.08   | -2.14                                       | 16.13   | 7.52   | 0.81  |
|                                               | 96                                          | 95.55   | 2.48   | -0.47                                       | 96.07   | 2.09   | 0.07  |

PHZ: phlorizin; PHT: phloretin

**Supplementary Table 3.** The extraction recovery of PHZ, PHT and IS (PHZ, PHT, n = 3; IS, n = 3\*)

|     | Nominal concentration ( $\mu\text{g/mL}$ ) | Extraction recovery (%) |
|-----|--------------------------------------------|-------------------------|
| PHZ | 0.4                                        | 82.71 ± 2.19            |
|     | 10                                         | 85.44 ± 0.94            |
|     | 80                                         | 83.94 ± 0.08            |
| PHT | 0.128                                      | 81.02 ± 1.80            |
|     | 16                                         | 89.60 ± 1.23            |
|     | 96                                         | 84.15 ± 1.18            |
| IS  | 12.5                                       | 75.55 ± 3.76            |

PHZ: phlorizin; PHT: phloretin

**Supplementary Table 4.** Stability tests of PHZ and PHT in rat plasma (n = 4).

| Conc.<br>(ng/mL) | Room temperature,<br>4 h Autosampler |        | Room temperature,<br>24 h Autosampler |        | Three freeze–thaw |        | –20°C, 30 days |        |
|------------------|--------------------------------------|--------|---------------------------------------|--------|-------------------|--------|----------------|--------|
|                  | RSD (%)                              | RE (%) | RSD (%)                               | RE (%) | RSD (%)           | RE (%) | RSD (%)        | RE (%) |
| 0.4              | 10.47                                | 2.86   | 10.37                                 | 7.57   | 6.57              | -0.51  | 11.70          | -0.05  |
| PHZ 10           | 6.00                                 | -2.71  | 7.55                                  | -4.11  | 6.94              | -3.56  | 7.68           | -4.32  |
| 80               | 4.08                                 | -2.75  | 5.54                                  | -1.03  | 4.69              | -3.13  | 4.18           | -3.23  |
| 0.128            | 3.53                                 | 19.31  | 2.18                                  | 18.31  | 1.74              | 18.44  | 2.12           | 16.77  |
| PHT 16           | 5.08                                 | -2.14  | 10.62                                 | 0.42   | 7.92              | 3.07   | 6.89           | 3.15   |
| 96               | 2.48                                 | -0.47  | 2.74                                  | -0.09  | 1.81              | 0.42   | 1.89           | 0.76   |

PHZ: phlorizin; PHT: phloretin
